# Supplementary material for: Endohedrally doped gold nanocages: efficient catalysts for O2 activation and CO oxidation
Source: Royal Society of Chemistry journal article supplement (doi:10.1039/c5cp05624a), 2015-11-23
Supplement: c5cp05624a1.pdf [file c5cp05624a1.pdf]

## **Endohedrally Doped Gold Cages: Efficient Catalysts of O<sub>2</sub> Activation and CO Oxidation**

*Dar Manzoor\*<sup>a</sup>, Sailaja Krishnamurty<sup>b</sup> and Sourav Pal\*<sup>a,c</sup>*

*<sup>a</sup>Theoretical Chemistry Group, Physical Chemistry Division, CSIR-National  
Chemical Laboratory, Pune-411008, India*

*<sup>b</sup>Functional Materials Division, CSIR-Central Electrochemical Research Institute,  
Karaikudi-630 006, India*

*<sup>c</sup>Department of Chemistry, Indian Institute of Technology, Bombay, Powai,  
Mumbai-400 076, India*

To whom correspondence should be addressed: [manndar22@gmail.com](mailto:manndar22@gmail.com) ;  
[s.pal@ncl.res.in](mailto:s.pal@ncl.res.in) ; [spal@chem.iitb.ac.in](mailto:spal@chem.iitb.ac.in)

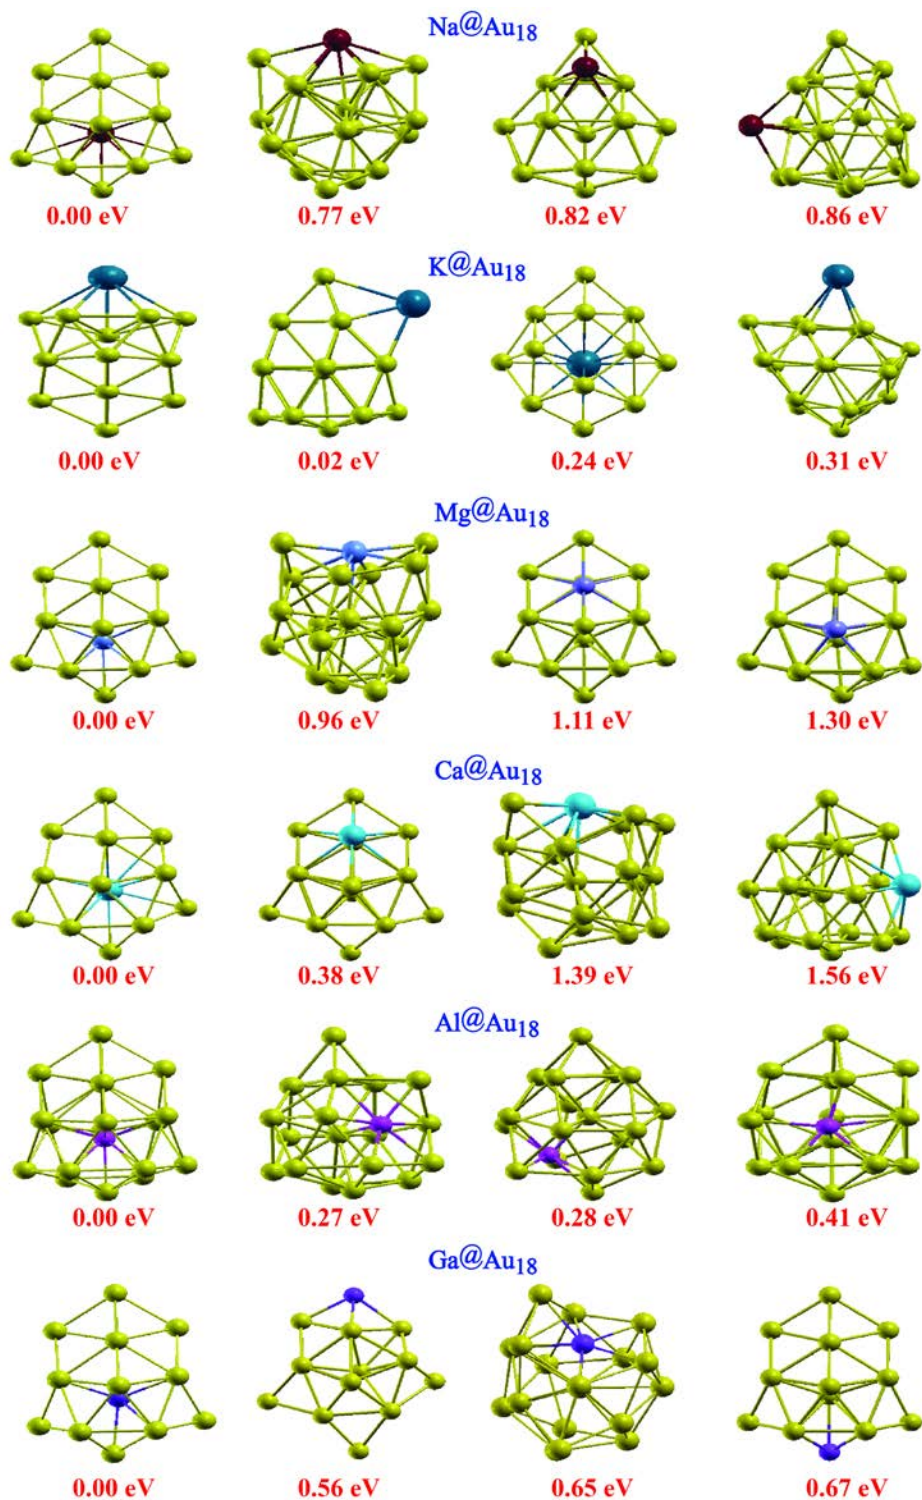

Fig. S1: Relative energies of the four lowest energy isomers of the  $M@Au_{18}$  nanocages ( $M = Na, K, Mg, Ca, Al$  and  $Ga$ ).

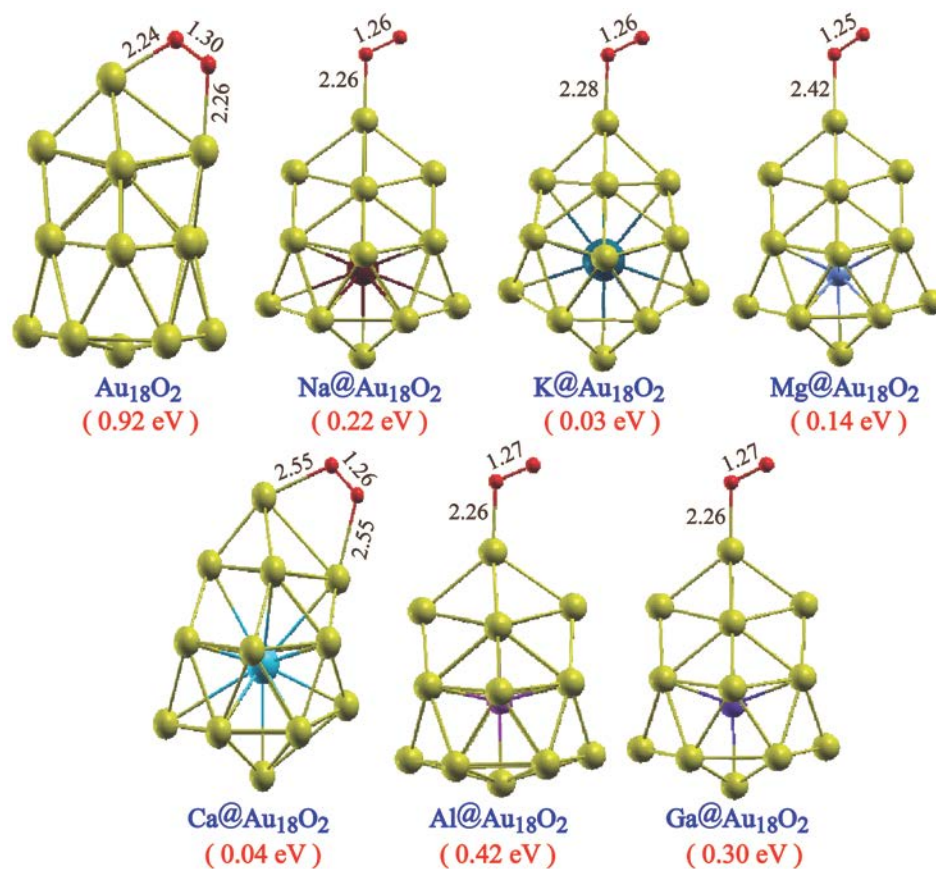

Fig. S2: Optimized geometries of the atop isomers (bridged for the pristine and Ca doped) of the doped gold cages with their relative energies with respect to lowest energy isomers.

Cartesian coordinates of the reactant, the transition state and the product for CO oxidation on the  $\text{Au}_{18}$  and  $\text{M@Au}_{18}$  ( $\text{M} = \text{Na}, \text{K}, \text{Mg}, \text{Ca}, \text{Al}$  and  $\text{Ga}$ ) clusters.

#### **$\text{Au}_{18}/\text{PBE}$ :**

##### **Reactant**

|    |           |           |           |
|----|-----------|-----------|-----------|
| Au | -2.236537 | -1.713118 | -0.001512 |
| Au | -0.298376 | -1.442450 | 2.097290  |
| Au | 2.248050  | 2.449521  | -1.429317 |
| Au | -0.299016 | 1.442221  | -2.097242 |
| Au | -0.298082 | -1.437716 | -2.099140 |

|    |           |           |           |
|----|-----------|-----------|-----------|
| Au | -2.674584 | 0.001700  | -2.250411 |
| Au | -0.035272 | -3.332311 | -0.003189 |
| Au | 2.249015  | -2.448796 | 1.429450  |
| Au | 2.249270  | -2.445691 | -1.434028 |
| Au | 2.043258  | 0.003224  | -2.785706 |
| Au | -2.674622 | -0.002582 | 2.250396  |
| Au | -2.237556 | 1.712743  | 0.001515  |
| Au | -0.036555 | 3.332242  | 0.003058  |
| Au | -0.298817 | 1.437682  | 2.099292  |
| Au | 2.248135  | 2.446427  | 1.433915  |
| Au | 2.043181  | -0.002559 | 2.785718  |
| Au | 2.444876  | 0.000413  | 0.000046  |
| Au | -4.436367 | -0.000949 | -0.000134 |

**I(1)**

|    |           |           |           |
|----|-----------|-----------|-----------|
| O  | -6.690078 | -0.049648 | -0.784376 |
| O  | -7.355152 | 0.090486  | 0.258405  |
| Au | -4.316854 | -0.046189 | -0.698338 |
| Au | -2.029458 | 1.451147  | -0.346908 |
| Au | -0.430932 | 1.540318  | 1.926553  |
| Au | 2.629469  | 0.021290  | 0.287692  |
| Au | 1.855716  | 0.200382  | 2.978428  |
| Au | 2.165881  | 2.565604  | 1.499348  |
| Au | 0.038409  | 3.261001  | -0.280804 |
| Au | 0.103722  | 1.285421  | -2.333319 |
| Au | 2.555762  | -0.168971 | -2.518053 |

|    |           |           |           |
|----|-----------|-----------|-----------|
| Au | 2.506933  | -2.506608 | -0.997497 |
| Au | 2.167941  | -2.340301 | 1.827605  |
| Au | 0.040749  | -3.270964 | 0.155408  |
| Au | 0.104358  | -1.585772 | -2.138582 |
| Au | -2.230574 | -0.181398 | -2.693597 |
| Au | -2.041645 | -1.504567 | -0.155284 |
| Au | -2.917242 | 0.138007  | 2.082182  |
| Au | -0.426313 | -1.257093 | 2.094319  |
| Au | 2.503536  | 2.351668  | -1.324219 |
| C  | -4.386870 | 0.214850  | 3.409682  |
| O  | -5.174238 | 0.262398  | 4.239982  |

**TS(1)**

|    |           |           |           |
|----|-----------|-----------|-----------|
| O  | -6.161411 | -0.540481 | 0.385952  |
| O  | -6.254504 | -1.733307 | -0.228111 |
| Au | -4.394096 | 0.782746  | 0.039414  |
| Au | -2.010747 | 0.454494  | 1.395409  |
| Au | 0.253209  | 0.356430  | 2.928431  |
| Au | 0.112488  | 2.304357  | 0.840568  |
| Au | 2.378213  | 2.414068  | -0.864258 |
| Au | 2.141803  | 0.787409  | -3.119292 |
| Au | 1.757540  | -2.014061 | -2.792065 |
| Au | -0.408114 | -0.341251 | -3.609827 |
| Au | -0.175104 | 2.002193  | -1.996128 |
| Au | -2.392583 | 2.663184  | -0.371675 |
| Au | -2.361006 | 0.165944  | -1.754927 |

|    |           |           |           |
|----|-----------|-----------|-----------|
| Au | -0.745520 | -2.094370 | -1.437660 |
| Au | 1.582300  | -3.071578 | -0.185994 |
| Au | 2.191880  | -1.504932 | 2.044796  |
| Au | 2.618132  | 1.296126  | 1.689628  |
| Au | 2.446240  | -0.401503 | -0.569619 |
| Au | -3.126202 | -1.953328 | 0.179840  |
| Au | -0.539698 | -1.903330 | 1.353350  |
| C  | -4.999453 | -2.669143 | -0.376731 |
| O  | -5.270825 | -3.704027 | -0.881330 |

**I(2)**

|    |           |           |           |
|----|-----------|-----------|-----------|
| O  | 5.919367  | -0.289491 | 0.664454  |
| O  | 5.930699  | 0.737311  | 1.592147  |
| Au | 4.282614  | -0.302742 | -0.750139 |
| Au | 1.928475  | -1.631219 | -0.158251 |
| Au | 0.452621  | -1.354145 | 2.179570  |
| Au | -2.618201 | 0.131709  | 0.305229  |
| Au | -1.785294 | 0.266732  | 3.008956  |
| Au | -2.233088 | -2.232217 | 1.847937  |
| Au | -0.212226 | -3.308169 | 0.175929  |
| Au | -0.160784 | -1.590302 | -2.101629 |
| Au | -2.517028 | -0.067896 | -2.520660 |
| Au | -2.407028 | 2.438506  | -1.313598 |
| Au | -2.076968 | 2.642029  | 1.499417  |
| Au | 0.089602  | 3.282338  | -0.290250 |
| Au | -0.022957 | 1.258538  | -2.318447 |

|    |           |           |           |
|----|-----------|-----------|-----------|
| Au | 2.293698  | -0.337907 | -2.679716 |
| Au | 2.141397  | 1.469083  | -0.462119 |
| Au | 2.957195  | 0.021363  | 2.003289  |
| Au | 0.466766  | 1.419206  | 1.776911  |
| Au | -2.644769 | -2.388819 | -0.960862 |
| C  | 4.796577  | 0.908318  | 2.474093  |
| O  | 4.954001  | 1.674576  | 3.377339  |

**TS(2)**

|    |           |           |           |
|----|-----------|-----------|-----------|
| O  | -5.246286 | 0.845142  | 1.044084  |
| O  | -5.702451 | -0.492544 | 1.963809  |
| Au | -4.330858 | 0.348626  | -0.823243 |
| Au | -1.922904 | 1.722529  | -0.434582 |
| Au | -0.446972 | 1.771492  | 1.915340  |
| Au | 2.519293  | -0.017906 | 0.366428  |
| Au | 1.713186  | 0.289009  | 3.037789  |
| Au | 2.256829  | 2.585305  | 1.532061  |
| Au | 0.253722  | 3.383526  | -0.313048 |
| Au | 0.159003  | 1.381422  | -2.360201 |
| Au | 2.473276  | -0.274244 | -2.444671 |
| Au | 2.249922  | -2.567285 | -0.877238 |
| Au | 1.852467  | -2.297450 | 1.960592  |
| Au | -0.247920 | -3.187898 | 0.268225  |
| Au | -0.059548 | -1.479549 | -2.044501 |
| Au | -2.327011 | 0.058413  | -2.727190 |
| Au | -2.226546 | -1.374242 | -0.225108 |

|    |           |           |           |
|----|-----------|-----------|-----------|
| Au | -2.971238 | 0.451162  | 1.977859  |
| Au | -0.644760 | -1.045123 | 2.110977  |
| Au | 2.641762  | 2.260116  | -1.293446 |
| C  | -4.670902 | -0.751547 | 2.690824  |
| O  | -4.525941 | -1.549580 | 3.585636  |

**Product**

|    |           |           |           |
|----|-----------|-----------|-----------|
| O  | -4.730725 | -0.276049 | -1.846083 |
| Au | -4.429354 | -0.019602 | 0.166239  |
| Au | -2.148296 | -1.639681 | 0.101280  |
| Au | -0.304785 | -1.444682 | -2.057987 |
| Au | 2.462850  | 0.005345  | -0.023504 |
| Au | 2.040089  | -0.046853 | -2.790200 |
| Au | 2.278529  | -2.477063 | -1.408063 |
| Au | -0.002273 | -3.339810 | 0.024556  |
| Au | -0.217093 | -1.404639 | 2.092548  |
| Au | 2.098763  | 0.062477  | 2.778630  |
| Au | 2.254039  | 2.484443  | 1.362085  |
| Au | 2.262579  | 2.432394  | -1.496786 |
| Au | -0.040591 | 3.336180  | -0.104171 |
| Au | -0.249960 | 1.510461  | 2.082464  |
| Au | -2.646646 | 0.041896  | 2.408287  |
| Au | -2.154745 | 1.598611  | 0.036698  |
| Au | -2.718323 | -0.030178 | -2.309483 |
| Au | -0.320130 | 1.368768  | -2.123656 |
| Au | 2.314408  | -2.410112 | 1.448008  |



**Na@Au<sub>18</sub>/PBE:**

**Reactant**

|    |           |           |           |
|----|-----------|-----------|-----------|
| Au | 2.221547  | 0.000105  | 1.664412  |
| Au | 2.729775  | -2.248939 | 0.000140  |
| Au | 0.434530  | -2.309037 | -1.581459 |
| Au | 0.434542  | -2.308646 | 1.581815  |
| Au | -1.749611 | -3.115368 | 0.000268  |
| Au | -3.473765 | -0.006653 | -0.000078 |
| Au | -2.251730 | -1.419167 | -2.146517 |
| Au | -2.253040 | 1.417417  | -2.140181 |
| Au | 0.433826  | 2.308849  | -1.575420 |
| Au | 0.433884  | 2.308916  | 1.575162  |
| Au | 2.734060  | 2.247753  | -0.000233 |
| Au | 2.221451  | -0.000163 | -1.664434 |
| Au | -0.051712 | 0.002598  | -3.180516 |
| Au | -0.051607 | 0.003048  | 3.180640  |
| Au | -2.251699 | -1.418740 | 2.146659  |
| Au | -2.253039 | 1.417609  | 2.140004  |
| Au | -1.752477 | 3.122454  | -0.000121 |
| Au | 4.514545  | -0.001671 | -0.000112 |
| Na | -0.498994 | -0.002616 | -0.000198 |

**I(I)**

|    |          |           |           |
|----|----------|-----------|-----------|
| O  | 6.253704 | -1.878085 | -0.360552 |
| O  | 6.832766 | -0.865169 | 0.144379  |
| Au | 4.030835 | -1.710663 | -0.580677 |

|    |           |           |           |
|----|-----------|-----------|-----------|
| Au | 1.399384  | -2.146922 | -1.354094 |
| Au | -1.246621 | -2.353772 | -2.006839 |
| Au | 0.202309  | -0.024331 | -3.062702 |
| Au | -1.068589 | 2.398256  | -2.030067 |
| Au | -1.263521 | 3.039896  | 0.783547  |
| Au | -2.142068 | 0.777635  | 2.212122  |
| Au | 0.751638  | 1.516433  | 2.107217  |
| Au | 1.230475  | 2.741165  | -0.447595 |
| Au | 2.431007  | 0.467946  | -1.434685 |
| Au | 3.395156  | 1.609814  | 1.005834  |
| Au | -0.043022 | -0.990100 | 2.982231  |
| Au | -2.587589 | -2.014566 | 2.554359  |
| Au | -3.041054 | -1.304263 | -0.073513 |
| Au | -2.576653 | 0.051498  | -2.560594 |
| Au | -3.301460 | 1.476427  | -0.284791 |
| Na | -0.443034 | 0.144412  | -0.201342 |
| Au | 2.012240  | -0.969607 | 1.188420  |
| Au | -0.478295 | -2.678901 | 0.712453  |
| C  | 5.224566  | 1.966390  | 1.694632  |
| O  | 6.275571  | 2.196186  | 2.079598  |

**TS(1)**

|    |           |           |           |
|----|-----------|-----------|-----------|
| O  | -5.934961 | -0.191998 | -0.290574 |
| O  | -6.225116 | 0.986768  | 0.284355  |
| Au | -3.955835 | -1.078762 | 0.003030  |
| Au | -1.605219 | -2.464739 | 0.125514  |

|    |           |           |           |
|----|-----------|-----------|-----------|
| Au | 1.341903  | -2.966586 | 0.205777  |
| Au | -0.142016 | -2.199257 | 2.498227  |
| Au | 0.337323  | 0.539199  | 3.181567  |
| Au | 1.326416  | 3.675473  | -0.170818 |
| Au | 2.325935  | 1.481393  | -1.557212 |
| Au | -0.673275 | 2.151474  | -1.513852 |
| Au | -0.690577 | 2.316034  | 1.293205  |
| Au | -2.010240 | -0.131801 | 1.802926  |
| Au | -3.147158 | 1.791333  | -0.160724 |
| Au | 0.440211  | 0.182752  | -3.183505 |
| Au | 2.469347  | -1.358875 | -1.894149 |
| Au | 3.965433  | -0.196230 | 0.085269  |
| Au | 2.405209  | -1.129655 | 2.148372  |
| Au | 2.285978  | 1.650695  | 1.489552  |
| Na | 0.429287  | -0.183613 | 0.033878  |
| Au | -1.941520 | -0.345044 | -1.820714 |
| Au | -0.061623 | -2.471920 | -2.214979 |
| C  | -5.136450 | 2.159680  | 0.359356  |
| O  | -5.604406 | 3.149276  | 0.802354  |

**I(2)**

|    |           |           |           |
|----|-----------|-----------|-----------|
| O  | -5.818974 | -0.081201 | -0.418990 |
| O  | -6.016994 | 1.040029  | 0.458623  |
| Au | -3.984240 | -1.125270 | -0.119915 |
| Au | -1.639129 | -2.500474 | 0.087599  |
| Au | 1.343362  | -2.957309 | 0.245850  |

|    |           |           |           |
|----|-----------|-----------|-----------|
| Au | -0.224236 | -2.174804 | 2.478661  |
| Au | 0.206766  | 0.565725  | 3.161649  |
| Au | 1.270679  | 3.687944  | -0.233397 |
| Au | 2.317978  | 1.480298  | -1.570660 |
| Au | -0.663451 | 2.141144  | -1.611913 |
| Au | -0.741527 | 2.339479  | 1.230534  |
| Au | -2.087334 | -0.133511 | 1.727075  |
| Au | -3.140539 | 1.760331  | -0.267632 |
| Au | 0.470802  | 0.130793  | -3.204109 |
| Au | 2.494835  | -1.365174 | -1.843316 |
| Au | 3.914200  | -0.121151 | 0.161849  |
| Au | 2.327101  | -1.085193 | 2.192648  |
| Au | 2.173836  | 1.688406  | 1.494332  |
| Na | 0.388973  | -0.189509 | 0.011939  |
| Au | -1.937647 | -0.373700 | -1.887018 |
| Au | -0.029005 | -2.494630 | -2.196240 |
| C  | -5.098975 | 2.045818  | 0.502730  |
| O  | -5.340114 | 3.071206  | 1.087676  |

**TS(2)**

|    |           |           |           |
|----|-----------|-----------|-----------|
| O  | -5.265424 | 0.453548  | -0.713616 |
| O  | -5.838813 | 1.308675  | 0.636894  |
| Au | -3.945062 | -1.173253 | -0.220343 |
| Au | -1.642868 | -2.559184 | 0.065589  |
| Au | 1.317842  | -2.968191 | 0.319964  |
| Au | -0.295082 | -2.146506 | 2.495121  |

|    |           |           |           |
|----|-----------|-----------|-----------|
| Au | 0.109173  | 0.620896  | 3.146094  |
| Au | 1.242217  | 3.708166  | -0.276032 |
| Au | 2.344919  | 1.475026  | -1.506825 |
| Au | -0.641214 | 2.110833  | -1.681967 |
| Au | -0.821124 | 2.344347  | 1.142854  |
| Au | -2.149021 | -0.148260 | 1.697867  |
| Au | -3.123039 | 1.739784  | -0.345562 |
| Au | 0.580654  | 0.099627  | -3.200442 |
| Au | 2.538374  | -1.362645 | -1.726913 |
| Au | 3.934545  | -0.106664 | 0.283066  |
| Au | 2.247594  | -1.048096 | 2.240564  |
| Au | 2.085395  | 1.719297  | 1.492074  |
| Na | 0.344966  | -0.201921 | 0.013507  |
| Au | -1.883889 | -0.409372 | -1.981119 |
| Au | 0.044133  | -2.524487 | -2.172518 |
| C  | -4.930303 | 2.168909  | 0.882467  |
| O  | -4.864919 | 3.096968  | 1.653029  |

**Product**

|    |           |           |           |
|----|-----------|-----------|-----------|
| O  | -4.734983 | 1.563560  | -0.327836 |
| Au | -4.177946 | -0.405081 | 0.031796  |
| Au | -2.136179 | -2.228237 | 0.091935  |
| Au | 0.768579  | -3.096357 | 0.103071  |
| Au | -0.586453 | -2.160642 | 2.408256  |
| Au | 0.324095  | 0.437713  | 3.175898  |
| Au | 1.789379  | 3.476465  | -0.121068 |

|    |           |           |           |
|----|-----------|-----------|-----------|
| Au | 2.346588  | 1.187716  | -1.589306 |
| Au | -0.429761 | 2.328873  | -1.478681 |
| Au | -0.387580 | 2.445646  | 1.362458  |
| Au | -2.104299 | 0.177285  | 1.845117  |
| Au | -2.815231 | 2.354670  | -0.011564 |
| Au | 0.268464  | 0.236061  | -3.212373 |
| Au | 2.080152  | -1.636003 | -2.001685 |
| Au | 3.736593  | -0.721730 | -0.022282 |
| Au | 2.109248  | -1.513884 | 2.063143  |
| Au | 2.404226  | 1.287711  | 1.493576  |
| Na | 0.241762  | -0.211070 | 0.009273  |
| Au | -2.134471 | 0.032428  | -1.854605 |
| Au | -0.609574 | -2.331580 | -2.251779 |

**K@Au<sub>18</sub>/PBE:**

**Reactant**

|    |           |           |           |
|----|-----------|-----------|-----------|
| Au | -2.280307 | 2.001091  | 0.000135  |
| Au | -2.379610 | 0.000098  | -2.103343 |
| Au | -0.497457 | -2.029349 | -2.388452 |
| Au | -0.497554 | 2.029718  | -2.388112 |
| Au | 1.331948  | 0.000349  | -3.094542 |
| Au | 3.531758  | 0.000187  | 0.000291  |
| Au | 2.261415  | -2.095877 | -1.442426 |
| Au | 2.261134  | -2.096025 | 1.442474  |
| Au | -0.497762 | -2.030145 | 2.388087  |
| Au | -0.498383 | 2.029417  | 2.388323  |

|    |           |           |           |
|----|-----------|-----------|-----------|
| Au | -2.379894 | -0.000786 | 2.102865  |
| Au | -2.280128 | -2.001330 | -0.000613 |
| Au | 0.159490  | -3.352237 | -0.000333 |
| Au | 0.159047  | 3.352211  | 0.000277  |
| Au | 2.261245  | 2.096472  | -1.442006 |
| Au | 2.260825  | 2.096146  | 1.442922  |
| Au | 1.330925  | -0.000093 | 3.094812  |
| Au | -4.304439 | 0.000156  | -0.000376 |
| K  | 0.240118  | -0.000006 | 0.000084  |

**I(1)**

|    |           |           |           |
|----|-----------|-----------|-----------|
| O  | -6.247504 | 1.666981  | 0.002874  |
| O  | -6.911241 | 0.584301  | -0.082980 |
| Au | -3.985894 | 1.530821  | 0.005084  |
| Au | -1.388693 | 2.521314  | -0.001714 |
| Au | 1.264528  | 3.284331  | -0.003344 |
| Au | 0.298911  | 2.016661  | -2.354294 |
| Au | 0.165622  | -0.702661 | -3.156144 |
| Au | 1.605324  | -2.584106 | -1.491669 |
| Au | 1.609041  | -2.579667 | 1.496111  |
| Au | -1.229823 | -2.385935 | 1.415387  |
| Au | -1.232845 | -2.387364 | -1.409034 |
| Au | -2.071933 | 0.385487  | -1.782529 |
| Au | -3.503043 | -1.421130 | 0.003833  |
| Au | 0.169037  | -0.695814 | 3.157370  |
| Au | 2.642498  | 0.226231  | 2.315750  |

|    |           |           |           |
|----|-----------|-----------|-----------|
| Au | 3.483675  | 1.597884  | -0.004393 |
| Au | 2.640480  | 0.218860  | -2.319333 |
| Au | 3.564590  | -1.222040 | -0.001260 |
| K  | 0.519350  | -0.031864 | -0.000143 |
| Au | -2.069762 | 0.388324  | 1.785470  |
| Au | 0.300137  | 2.021864  | 2.350263  |
| C  | -5.371182 | -2.141753 | 0.011064  |
| O  | -6.382088 | -2.673268 | 0.017307  |

**TS(1)**

|    |           |           |           |
|----|-----------|-----------|-----------|
| O  | 5.951025  | 0.692089  | -0.422533 |
| O  | 6.354751  | -0.570602 | -0.672240 |
| Au | 3.833997  | 1.235121  | -0.706261 |
| Au | 1.361299  | 2.315384  | -0.978771 |
| Au | -1.266026 | 3.155760  | -1.141989 |
| Au | -0.225047 | 2.739079  | 1.468017  |
| Au | -0.143187 | 0.422720  | 3.167466  |
| Au | -1.584686 | -1.909208 | 2.297679  |
| Au | -1.750865 | -2.895139 | -0.471030 |
| Au | 1.101578  | -2.755645 | -0.593742 |
| Au | 1.269293  | -1.756960 | 2.044938  |
| Au | 2.064919  | 0.972612  | 1.498299  |
| Au | 3.477166  | -1.450382 | 0.330020  |
| Au | -0.406171 | -1.771625 | -2.755427 |
| Au | -2.815101 | -0.529632 | -2.196111 |
| Au | -3.531287 | 1.590784  | -0.487497 |



|    |           |           |           |
|----|-----------|-----------|-----------|
| Au | -2.595018 | 1.162897  | 2.113402  |
| Au | -3.574517 | -1.013093 | 0.530638  |
| K  | -0.551480 | -0.009158 | -0.016756 |
| Au | 1.889217  | -0.324678 | -2.041276 |
| Au | -0.490448 | 1.089494  | -2.936989 |
| C  | 5.429981  | -1.777492 | -0.335484 |
| O  | 5.948814  | -2.817239 | -0.564787 |

**I(2)**

|    |           |           |           |
|----|-----------|-----------|-----------|
| O  | 5.787066  | 0.404102  | -0.125912 |
| O  | 5.936698  | -0.788418 | -0.939639 |
| Au | 3.899483  | 1.369113  | -0.393800 |
| Au | 1.466764  | 2.487152  | -0.754630 |
| Au | -1.159040 | 3.277768  | -1.005706 |
| Au | -0.163018 | 2.812825  | 1.599311  |
| Au | -0.385242 | 0.462660  | 3.184652  |
| Au | -1.518015 | -2.020934 | 2.313747  |
| Au | -1.661863 | -2.999032 | -0.403010 |
| Au | 1.089478  | -3.032152 | -0.127138 |
| Au | 1.316406  | -1.648010 | 2.352785  |
| Au | 2.069141  | 1.060551  | 1.766912  |
| Au | 3.251324  | -1.328218 | 0.308110  |
| Au | 0.103831  | -1.868944 | -2.520483 |
| Au | -2.556029 | -1.077572 | -2.280690 |
| Au | -3.117801 | 1.338091  | -1.069320 |
| Au | -2.631864 | 1.460809  | 1.728127  |

|    |           |           |           |
|----|-----------|-----------|-----------|
| Au | -3.425957 | -0.955212 | 0.524068  |
| K  | -0.325428 | -0.076470 | 0.065969  |
| Au | 2.016110  | 0.096716  | -2.175521 |
| Au | -0.604974 | 1.043706  | -2.758302 |
| C  | 5.020286  | -1.771753 | -0.802314 |
| O  | 5.145169  | -2.838518 | -1.344361 |

### TS(2)

|    |           |           |           |
|----|-----------|-----------|-----------|
| O  | -5.414879 | 0.101931  | 0.880539  |
| O  | -6.199076 | -0.570872 | -0.463803 |
| Au | -3.858580 | 1.554154  | 0.361488  |
| Au | -1.409326 | 2.626492  | 0.060558  |
| Au | 1.252461  | 3.304061  | -0.258833 |
| Au | 0.052559  | 1.879927  | -2.398841 |
| Au | -0.130414 | -0.952328 | -2.963965 |
| Au | 1.299729  | -2.763586 | -1.266349 |
| Au | 1.585901  | -2.503149 | 1.648976  |
| Au | -1.276802 | -2.211689 | 1.830587  |
| Au | -1.491520 | -2.457163 | -0.999936 |
| Au | -2.248461 | 0.375742  | -1.665862 |
| Au | -3.568401 | -1.373760 | 0.428871  |
| Au | 0.376361  | -0.488572 | 3.313535  |
| Au | 2.768029  | 0.307081  | 2.191541  |
| Au | 3.451604  | 1.532108  | -0.220175 |
| Au | 2.364372  | 0.148203  | -2.410541 |

|    |           |           |           |
|----|-----------|-----------|-----------|
| Au | 3.377616  | -1.259743 | -0.131626 |
| K  | 0.384607  | -0.019776 | 0.081348  |
| Au | -1.912062 | 0.634700  | 2.179557  |
| Au | 0.537194  | 2.199362  | 2.263472  |
| C  | -5.418836 | -1.516840 | -0.819163 |
| O  | -5.494322 | -2.374788 | -1.662146 |

### **Product**

|    |           |           |           |
|----|-----------|-----------|-----------|
| O  | -4.451033 | 0.364869  | 0.021629  |
| Au | -3.056940 | 1.816905  | 0.717082  |
| Au | -0.794964 | 3.173212  | -0.123180 |
| Au | 1.517192  | 2.702780  | -1.576427 |
| Au | -0.765417 | 1.592586  | -2.655926 |
| Au | -0.994458 | -1.202617 | -2.765614 |
| Au | 1.094436  | -2.733294 | -1.796251 |
| Au | 1.141155  | -2.624463 | 1.295675  |
| Au | -1.441852 | -2.187461 | 2.290436  |
| Au | -1.282201 | -2.996609 | -0.419749 |
| Au | -3.077931 | 0.359851  | -1.843819 |
| Au | -3.368412 | -1.424739 | 0.476617  |
| Au | 0.152580  | -0.228588 | 3.443709  |
| Au | 2.517200  | -0.243031 | 2.025812  |
| Au | 3.373366  | 1.121034  | -0.282287 |
| Au | 1.786612  | -0.029920 | -2.445262 |
| Au | 3.156821  | -1.624160 | -0.345962 |

K -0.216552 0.013521 0.122071

Au -1.015528 2.133928 2.528208

Au 1.561162 2.354384 1.445390

**Mg@Au<sub>18</sub>/PBE:**

**Reactant**

Au -2.183663 0.000009 -1.522375

Au -2.840278 -2.262553 -0.000003

Au -0.411419 -2.225491 1.459092

Au -0.411418 -2.225488 -1.459097

Au 1.785370 -3.250818 -0.000003

Au 3.575513 -0.000129 0.000001

Au 2.241253 -1.416122 2.078376

Au 2.241289 1.416089 2.078196

Au -0.411398 2.225469 1.459017

Au -0.411397 2.225472 -1.459013

Au -2.840351 2.262516 0.000001

Au -2.183664 0.000006 1.522373

Au 0.054781 0.000037 3.171146

Au 0.054783 0.000044 -3.171146

Au 2.241255 -1.416117 -2.078378

Au 2.241291 1.416094 -2.078191

Au 1.785207 3.251106 0.000004

Au -4.637352 -0.000107 -0.000002

Mg 0.725483 -0.000114 0.000000

**I(1)**

|              |           |           |           |
|--------------|-----------|-----------|-----------|
| O            | 6.836854  | -0.823753 | 0.549903  |
| O            | 7.491523  | 0.237473  | 0.642509  |
| Au           | 4.463853  | -0.703881 | -0.083447 |
| Au           | 2.032751  | -0.248362 | 1.380575  |
| Au           | -0.122752 | -0.051063 | 3.141729  |
| Au           | -0.018327 | -2.331561 | 1.464607  |
| Au           | -2.394416 | -3.025603 | 0.036476  |
| Au           | -2.558582 | -1.146312 | -2.019969 |
| Au           | -2.190414 | 1.654495  | -2.142360 |
| Au           | -0.181945 | -0.082148 | -3.132726 |
| Au           | -0.048404 | -2.338388 | -1.442601 |
| Au           | 2.342045  | -2.679177 | -0.019337 |
| Au           | 2.058944  | -0.272073 | -1.492475 |
| Au           | 0.552806  | 2.087051  | -1.443861 |
| Au           | -1.527054 | 3.352257  | -0.004913 |
| Au           | -2.143590 | 1.676448  | 2.165277  |
| Au           | -2.513967 | -1.127110 | 2.076250  |
| Au           | -3.627361 | 0.509651  | 0.036605  |
| Mg           | -0.840129 | 0.052503  | 0.009630  |
| Au           | 3.131620  | 1.943216  | -0.047237 |
| Au           | 0.578750  | 2.122954  | 1.420484  |
| C            | 4.365109  | 3.486847  | -0.078497 |
| O            | 5.047659  | 4.406017  | -0.092113 |
| <b>TS(1)</b> |           |           |           |
| O            | -6.161411 | -0.540481 | 0.385952  |

|             |           |           |           |
|-------------|-----------|-----------|-----------|
| O           | -6.254504 | -1.733307 | -0.228111 |
| Au          | -4.394096 | 0.782746  | 0.039414  |
| Au          | -1.967582 | 0.388964  | 1.479774  |
| Au          | 0.228074  | 0.218366  | 3.134586  |
| Au          | 0.080153  | 2.452451  | 1.328557  |
| Au          | 2.471204  | 2.710789  | -0.186117 |
| Au          | 2.556682  | 1.061440  | -2.430721 |
| Au          | 2.164345  | -1.718353 | -1.897288 |
| Au          | 0.139804  | -0.125156 | -3.125101 |
| Au          | 0.043675  | 2.288442  | -1.578462 |
| Au          | -2.394414 | 2.672007  | -0.113336 |
| Au          | -2.022586 | 0.229980  | -1.457495 |
| Au          | -0.605079 | -2.172746 | -1.303262 |
| Au          | 1.413643  | -3.466978 | 0.171313  |
| Au          | 2.203852  | -1.507491 | 2.013472  |
| Au          | 2.612110  | 1.315598  | 2.214019  |
| Au          | 3.569715  | -0.121475 | -0.041260 |
| Mg          | 0.763011  | 0.028812  | -0.010439 |
| Au          | -3.126202 | -1.953328 | 0.179840  |
| Au          | -0.586823 | -2.024919 | 1.554307  |
| C           | -4.999453 | -2.669143 | -0.376731 |
| O           | -5.270825 | -3.704027 | -0.881330 |
| <b>I(2)</b> |           |           |           |
| O           | -5.900047 | -0.672311 | 0.593371  |
| O           | -6.016775 | -1.760273 | -0.327540 |

|              |           |           |           |
|--------------|-----------|-----------|-----------|
| Au           | -4.424074 | 0.796470  | 0.085053  |
| Au           | -2.007293 | 0.385633  | 1.495851  |
| Au           | 0.198443  | 0.293577  | 3.139820  |
| Au           | 0.025863  | 2.432932  | 1.280237  |
| Au           | 2.381072  | 2.970688  | -0.226508 |
| Au           | 2.526497  | 0.984005  | -2.166960 |
| Au           | 2.106032  | -1.816302 | -2.233575 |
| Au           | 0.077729  | -0.109564 | -3.134760 |
| Au           | -0.011402 | 2.253217  | -1.579764 |
| Au           | -2.474389 | 2.698535  | -0.136658 |
| Au           | -2.058908 | 0.204729  | -1.425272 |
| Au           | -0.595225 | -2.213819 | -1.303066 |
| Au           | 1.621264  | -3.112808 | 0.187439  |
| Au           | 2.206735  | -1.519130 | 2.399089  |
| Au           | 2.582449  | 1.253270  | 1.937796  |
| Au           | 3.434917  | -0.640913 | -0.015275 |
| Mg           | 0.725969  | -0.032337 | -0.013800 |
| Au           | -3.053387 | -2.025533 | 0.210243  |
| Au           | -0.548258 | -2.016285 | 1.609745  |
| C            | -4.957048 | -2.617711 | -0.481952 |
| O            | -5.086477 | -3.640322 | -1.102576 |
| <b>TS(2)</b> |           |           |           |
| O            | -5.346469 | 0.616374  | -0.261871 |
| O            | -5.880861 | 1.500335  | 1.111937  |
| Au           | -4.301316 | -1.250489 | 0.061110  |

|    |           |           |           |
|----|-----------|-----------|-----------|
| Au | -1.950603 | -0.516863 | -1.416996 |
| Au | 0.200636  | -0.116248 | -3.083697 |
| Au | 0.265351  | -2.437248 | -1.409546 |
| Au | 2.698432  | -2.524789 | 0.040931  |
| Au | 2.666120  | -0.917632 | 2.314055  |
| Au | 2.016340  | 1.826824  | 1.848978  |
| Au | 0.184914  | 0.048677  | 3.126957  |
| Au | 0.265802  | -2.338978 | 1.497764  |
| Au | -2.148334 | -2.933188 | 0.056622  |
| Au | -1.972364 | -0.503674 | 1.531345  |
| Au | -0.780062 | 2.084228  | 1.385696  |
| Au | 1.100916  | 3.599952  | -0.108739 |
| Au | 2.058816  | 1.738993  | -1.970574 |
| Au | 2.709123  | -1.044756 | -2.303255 |
| Au | 3.584900  | 0.381642  | -0.015416 |
| Mg | 0.764733  | 0.014122  | -0.025989 |
| Au | -3.208706 | 1.702614  | 0.048667  |
| Au | -0.776883 | 2.020939  | -1.493460 |
| C  | -4.894538 | 2.271972  | 1.367897  |
| O  | -4.739597 | 3.155355  | 2.177131  |

**Product**

|    |           |           |           |
|----|-----------|-----------|-----------|
| O  | 4.989440  | 1.486310  | -0.214772 |
| Au | 4.411982  | -0.480899 | -0.000023 |
| Au | 2.082798  | -0.071151 | 1.543532  |
| Au | -0.164391 | 0.303074  | 3.132335  |



|    |           |           |           |
|----|-----------|-----------|-----------|
| Au | 0.368699  | -2.274809 | 1.929006  |
| Au | -1.588206 | -2.921919 | 0.022147  |
| Au | -2.281812 | -1.370182 | -2.225730 |
| Au | -2.248646 | 1.386358  | -1.555881 |
| Au | -0.163936 | 0.243448  | -3.137698 |
| Au | 0.370681  | -2.312651 | -1.888572 |
| Au | 2.443777  | -2.524976 | 0.032280  |
| Au | 2.077676  | -0.102257 | -1.538787 |
| Au | 0.527360  | 2.301794  | -1.393938 |
| Au | -1.624334 | 3.627992  | -0.025566 |
| Au | -2.248729 | 1.416818  | 1.534733  |
| Au | -2.278024 | -1.328022 | 2.237818  |
| Au | -3.688997 | -0.535282 | 0.002352  |
| Mg | -0.456210 | -0.243018 | 0.002288  |
| Au | 3.017644  | 2.185985  | -0.013249 |
| Au | 0.550494  | 2.343081  | 1.366643  |

**Ca@Au<sub>18</sub>/PBE:**

**Reactant**

|    |           |           |           |
|----|-----------|-----------|-----------|
| Au | 2.326173  | 0.046457  | 1.838686  |
| Au | 2.482863  | -2.083780 | -0.000002 |
| Au | 0.567819  | -2.315866 | -2.010860 |
| Au | 0.567842  | -2.315835 | 2.010888  |
| Au | -1.237948 | -3.182903 | 0.000034  |
| Au | -3.587590 | -0.322911 | 0.000021  |
| Au | -2.164985 | -1.553220 | -2.150423 |

|    |           |           |           |
|----|-----------|-----------|-----------|
| Au | -2.367596 | 1.282970  | -2.045960 |
| Au | 0.326275  | 2.434079  | -1.515813 |
| Au | 0.326279  | 2.434114  | 1.515769  |
| Au | 2.630835  | 2.169484  | -0.000018 |
| Au | 2.326142  | 0.046446  | -1.838701 |
| Au | -0.076380 | 0.186661  | -3.203898 |
| Au | -0.076339 | 0.186717  | 3.203886  |
| Au | -2.164959 | -1.553182 | 2.150472  |
| Au | -2.367572 | 1.283008  | 2.045960  |
| Au | -1.966912 | 3.132624  | -0.000023 |
| Au | 4.546039  | 0.158617  | -0.000019 |
| Ca | -0.355448 | -0.132239 | 0.000002  |

**I(1)**

|    |           |           |           |
|----|-----------|-----------|-----------|
| O  | -6.610281 | -1.559284 | 0.503018  |
| O  | -7.615118 | -0.822155 | 0.386140  |
| Au | -4.415743 | -0.741249 | -0.092067 |
| Au | -2.109837 | -0.249230 | -1.570471 |
| Au | 0.165149  | 0.153063  | -3.141577 |
| Au | 0.063029  | -2.415041 | -1.996031 |
| Au | 2.068944  | -2.909666 | -0.015032 |
| Au | 2.565104  | -1.179476 | 2.174714  |
| Au | 2.222553  | 1.635433  | 2.141587  |
| Au | 0.106640  | 0.092090  | 3.146228  |
| Au | 0.025382  | -2.454484 | 1.938821  |
| Au | -1.902683 | -2.651029 | -0.048759 |

|    |           |           |           |
|----|-----------|-----------|-----------|
| Au | -2.125318 | -0.285642 | 1.504899  |
| Au | -0.721104 | 2.226478  | 1.459280  |
| Au | 1.479137  | 3.327206  | 0.051125  |
| Au | 2.266860  | 1.680650  | -2.062489 |
| Au | 2.610999  | -1.133763 | -2.152601 |
| Au | 3.739748  | 0.342614  | 0.046672  |
| Ca | 0.647627  | -0.097049 | 0.001055  |
| Au | -3.223609 | 1.868022  | -0.038037 |
| Au | -0.679440 | 2.262105  | -1.443008 |
| C  | -4.450678 | 3.417113  | 0.015568  |
| O  | -5.146787 | 4.326450  | 0.051885  |

**TS(1)**

|    |           |           |           |
|----|-----------|-----------|-----------|
| O  | 6.215506  | -0.045539 | -0.389128 |
| O  | 6.422453  | 1.129586  | 0.233396  |
| Au | 4.300000  | -1.185977 | -0.053312 |
| Au | 2.157546  | -0.370266 | 1.587311  |
| Au | -0.100500 | -0.009887 | 3.092320  |
| Au | -0.323666 | -2.520271 | 1.679516  |
| Au | -2.698359 | -2.528909 | 0.128029  |
| Au | -2.779704 | -0.923880 | -2.122289 |
| Au | -1.993091 | 1.805418  | -2.222191 |
| Au | -0.235251 | -0.235199 | -3.117461 |
| Au | -0.357046 | -2.618163 | -1.498430 |
| Au | 1.976367  | -2.719584 | 0.080625  |
| Au | 2.065020  | -0.511182 | -1.639980 |

|    |           |           |           |
|----|-----------|-----------|-----------|
| Au | 0.909922  | 2.050767  | -1.637495 |
| Au | -1.072662 | 3.370862  | -0.107259 |
| Au | -1.936495 | 1.943660  | 2.131583  |
| Au | -2.688637 | -0.786956 | 2.290404  |
| Au | -3.592670 | 0.800102  | 0.026572  |
| Ca | -0.635448 | 0.007398  | 0.004506  |
| Au | 3.334987  | 1.675434  | -0.182905 |
| Au | 0.945148  | 2.169714  | 1.448557  |
| C  | 5.268608  | 2.159525  | 0.427177  |
| O  | 5.628996  | 3.146675  | 0.973564  |

**I(2)**

|    |           |           |           |
|----|-----------|-----------|-----------|
| O  | -5.891099 | 0.596207  | 0.259319  |
| O  | -5.803561 | 1.672972  | -0.686854 |
| Au | -4.358574 | -0.902652 | 0.073695  |
| Au | -2.137578 | -0.231200 | -1.574892 |
| Au | 0.104070  | 0.184808  | -3.120627 |
| Au | 0.028214  | -2.332980 | -1.789805 |
| Au | 2.503826  | -2.654428 | -0.461101 |
| Au | 2.808237  | -1.214665 | 1.886101  |
| Au | 2.134075  | 1.513211  | 2.354107  |
| Au | 0.343038  | -0.641801 | 3.090267  |
| Au | 0.181371  | -2.730541 | 1.163749  |
| Au | -2.315845 | -2.701996 | -0.193614 |
| Au | -2.036668 | -0.610923 | 1.662125  |
| Au | -0.759228 | 1.851568  | 2.142319  |

|    |           |           |           |
|----|-----------|-----------|-----------|
| Au | 0.995158  | 3.235797  | 0.432359  |
| Au | 1.953994  | 2.097153  | -1.967892 |
| Au | 2.664911  | -0.632296 | -2.355852 |
| Au | 3.614013  | 0.794264  | -0.021902 |
| Ca | 0.609078  | 0.073272  | 0.007449  |
| Au | -2.987476 | 1.839599  | 0.388483  |
| Au | -0.870613 | 2.341866  | -1.486728 |
| C  | -4.720129 | 2.500722  | -0.650833 |
| O  | -4.704088 | 3.524872  | -1.283280 |

**TS(2)**

|    |           |           |           |
|----|-----------|-----------|-----------|
| O  | -5.184745 | 0.957342  | 0.110124  |
| O  | -5.649121 | 1.881727  | 1.442790  |
| Au | -4.174869 | -0.968772 | 0.281719  |
| Au | -2.109404 | -0.199504 | -1.477514 |
| Au | 0.101711  | 0.134144  | -3.106679 |
| Au | 0.010848  | -2.468654 | -1.975289 |
| Au | 2.169117  | -2.925642 | -0.177939 |
| Au | 2.809537  | -1.284133 | 2.021909  |
| Au | 2.409337  | 1.553166  | 2.061939  |
| Au | 0.475288  | -0.093407 | 3.225744  |
| Au | 0.211558  | -2.587249 | 1.844629  |
| Au | -1.940675 | -2.608152 | 0.028270  |
| Au | -1.885902 | -0.412531 | 1.846188  |
| Au | -0.488177 | 2.144883  | 1.686222  |
| Au | 1.539648  | 3.281107  | 0.060617  |

|    |           |           |           |
|----|-----------|-----------|-----------|
| Au | 2.212306  | 1.688281  | -2.117697 |
| Au | 2.591305  | -1.138787 | -2.290240 |
| Au | 3.779333  | 0.304205  | -0.125931 |
| Ca | 0.688301  | -0.147032 | 0.005694  |
| Au | -2.960687 | 1.929252  | 0.428254  |
| Au | -0.688457 | 2.244088  | -1.317992 |
| C  | -4.596743 | 2.570061  | 1.730816  |
| O  | -4.431214 | 3.421299  | 2.571418  |

### **Product**

|    |           |           |           |
|----|-----------|-----------|-----------|
| O  | 5.162958  | 0.792330  | 0.144694  |
| Au | 4.124803  | -1.001461 | -0.036173 |
| Au | 2.197194  | -0.206632 | 1.827070  |
| Au | -0.189266 | 0.499867  | 3.096063  |
| Au | 0.269307  | -2.220878 | 2.267313  |
| Au | -1.232192 | -2.966474 | -0.012922 |
| Au | -2.423609 | -1.304224 | -2.066821 |
| Au | -2.577351 | 1.529581  | -1.800130 |
| Au | -0.259454 | 0.570606  | -3.074428 |
| Au | 0.199218  | -2.169631 | -2.328320 |
| Au | 1.815029  | -2.522521 | -0.060689 |
| Au | 2.158843  | -0.184337 | -1.863602 |
| Au | 1.063972  | 2.462391  | -1.430291 |
| Au | -1.270853 | 3.188949  | 0.005706  |
| Au | -2.499688 | 1.519813  | 1.863345  |

|    |           |           |           |
|----|-----------|-----------|-----------|
| Au | -2.357915 | -1.326010 | 2.106925  |
| Au | -3.848754 | -0.235952 | 0.047471  |
| Ca | -0.413714 | 0.036352  | -0.001019 |
| Au | 3.369279  | 1.841867  | -0.000411 |
| Au | 1.043345  | 2.435605  | 1.445498  |

**Al@Au<sub>18</sub>/PBE:**

**Reactant**

|    |           |           |           |
|----|-----------|-----------|-----------|
| Au | 2.277718  | 1.617123  | -0.318542 |
| Au | 2.773098  | 0.456119  | 2.285079  |
| Au | 0.382478  | -1.058894 | 2.567635  |
| Au | 0.316528  | 1.707052  | 1.712709  |
| Au | -1.925968 | 0.602138  | 2.948108  |
| Au | -3.130034 | 0.025351  | -0.007672 |
| Au | -2.202325 | -1.962552 | 1.841183  |
| Au | -2.201136 | -2.519478 | -0.957802 |
| Au | 0.384628  | -1.958688 | -1.974049 |
| Au | 0.318784  | 0.927713  | -2.233257 |
| Au | 2.774808  | -0.446226 | -2.285778 |
| Au | 2.106625  | -1.386191 | 0.273748  |
| Au | 0.049227  | -3.209899 | 0.634429  |
| Au | 0.025491  | 3.240166  | -0.638927 |
| Au | -2.254278 | 2.556847  | 0.940993  |
| Au | -2.251507 | 2.008011  | -1.843638 |

Au -1.924708 -0.564210 -2.952521

Au 4.571765 0.031008 -0.003997

Al -0.554182 -0.397382 0.074741

**I(1)**

O -6.124362 1.648085 -0.290739

O -6.706007 0.513473 -0.201595

Au -3.883483 1.643573 -0.204146

Au -1.332639 2.693524 -0.468972

Au 1.197873 3.728503 -0.883428

Au 0.561260 1.312922 -2.211589

Au 0.009036 -1.321754 -3.033601

Au 1.165511 -2.542265 -0.716737

Au 1.707774 -2.181791 2.078692

Au -0.973561 -1.880459 1.273991

Au -1.652077 -2.824113 -1.307285

Au -1.698740 -0.024738 -1.158806

Au -3.604528 -1.386589 0.484693

Au 0.160290 -0.099111 3.222263

Au 2.772780 0.469617 2.263030

Au 2.826477 1.455490 -0.426935

Au 2.651781 -0.662409 -2.390107

Au 3.612894 -1.250067 0.161573

Al 0.791561 -0.104873 0.259596

Au -1.908248 0.829556 1.639628

Au 0.637706 2.221542 1.527165



C -5.519553 -1.897524 0.752160

O -6.536053 -2.359612 0.993251

**TS(1)**

O -5.860085 1.289887 -0.624562

O -6.522790 0.390397 0.111520

Au -3.722403 1.672433 -0.359648

Au -1.204927 2.735806 -0.551018

Au 1.362532 3.664806 -0.951541

Au 0.638126 1.256984 -2.297205

Au -0.028625 -1.424942 -3.014550

Au 1.029072 -2.574825 -0.656445

Au 1.560912 -2.215137 2.126901

Au -1.159324 -1.793313 1.361508

Au -1.788089 -2.811612 -1.205601

Au -1.534230 -0.028800 -1.079473

Au -3.741078 -1.188154 0.404253

Au 0.157586 -0.019558 3.225127

Au 2.810505 0.404555 2.293446

Au 2.829528 1.308454 -0.445644

Au 2.630693 -0.811949 -2.392843

Au 3.505009 -1.363220 0.187520

Al 0.787727 -0.158402 0.425657

Au -1.861076 1.013607 1.657700

Au 0.744079 2.270474 1.500904

C -5.784404 -0.966870 0.681631

O -6.563221 -1.641877 1.251639

**I(2)**

O -5.633189 1.049646 -0.677268

O -6.239383 0.445551 0.482315

Au -3.648039 1.770899 -0.381088

Au -1.118460 2.816170 -0.516413

Au 1.497474 3.651705 -0.868591

Au 0.657434 1.320960 -2.302029

Au -0.098995 -1.333954 -3.060201

Au 0.939478 -2.583184 -0.712657

Au 1.484978 -2.301779 2.121826

Au -1.217816 -1.789243 1.367831

Au -1.827459 -2.764133 -1.252952

Au -1.486129 0.029785 -1.029510

Au -3.765280 -1.217971 0.270407

Au 0.146462 -0.051446 3.223505

Au 2.816134 0.288713 2.300449

Au 2.828610 1.223509 -0.425289

Au 2.565059 -0.824337 -2.414110

Au 3.394120 -1.490841 0.158157

Al 0.768886 -0.201342 0.506254

Au -1.825759 1.083348 1.660722

Au 0.803556 2.249400 1.547530

C -5.705721 -0.734560 0.927751

O -6.283081 -1.383414 1.761548

**TS(2)**

|    |           |           |           |
|----|-----------|-----------|-----------|
| O  | -5.300672 | 0.485626  | -0.541223 |
| O  | -6.077757 | 0.173065  | 0.941535  |
| Au | -3.647777 | 1.841932  | -0.379312 |
| Au | -1.151408 | 2.875623  | -0.385323 |
| Au | 1.465839  | 3.732792  | -0.504515 |
| Au | 0.769067  | 1.526872  | -2.215404 |
| Au | 0.104792  | -1.106813 | -3.185688 |
| Au | 1.003268  | -2.476270 | -0.876539 |
| Au | 1.400098  | -2.447109 | 1.959708  |
| Au | -1.271376 | -2.030840 | 1.147154  |
| Au | -1.769635 | -2.603941 | -1.606815 |
| Au | -1.458824 | 0.153898  | -1.221194 |
| Au | -3.689590 | -1.232445 | 0.098843  |
| Au | -0.036382 | -0.357985 | 3.223566  |
| Au | 2.652813  | 0.126240  | 2.456504  |
| Au | 2.741323  | 1.263796  | -0.175400 |
| Au | 2.713933  | -0.609998 | -2.346349 |
| Au | 3.444046  | -1.430125 | 0.210916  |
| Al | 0.629988  | -0.228201 | 0.515043  |
| Au | -1.890160 | 0.841498  | 1.582123  |
| Au | 0.655530  | 2.127700  | 1.750019  |
| C  | -5.465286 | -0.856675 | 1.384729  |
| O  | -5.647456 | -1.569254 | 2.342799  |

**Product**

|    |           |           |           |
|----|-----------|-----------|-----------|
| O  | -5.147947 | 0.337580  | -0.095286 |
| Au | -3.700660 | 1.806657  | -0.199892 |
| Au | -1.186110 | 2.835927  | -0.648621 |
| Au | 1.440502  | 3.568133  | -1.193311 |
| Au | 0.493211  | 1.176287  | -2.425768 |
| Au | -0.277612 | -1.530732 | -2.940341 |
| Au | 0.821647  | -2.682794 | -0.595042 |
| Au | 1.327454  | -2.209178 | 2.200945  |
| Au | -1.437245 | -1.622440 | 1.587261  |
| Au | -1.929889 | -2.863541 | -0.973864 |
| Au | -1.523097 | -0.000807 | -0.905467 |
| Au | -3.876595 | -1.283769 | 0.189354  |
| Au | 0.123594  | 0.122570  | 3.275972  |
| Au | 2.754639  | 0.370701  | 2.256572  |
| Au | 2.688370  | 1.153976  | -0.558789 |
| Au | 2.419955  | -0.969702 | -2.424937 |
| Au | 3.249212  | -1.511510 | 0.176609  |
| Al | 0.664454  | -0.226934 | 0.550390  |
| Au | -1.799982 | 1.325490  | 1.743133  |
| Au | 0.824578  | 2.317890  | 1.355266  |

**Ga@Au<sub>18</sub>/PBE:**

**Reactant**

|    |           |           |           |
|----|-----------|-----------|-----------|
| Au | -2.223764 | -0.092931 | 1.617023  |
| Au | -2.884124 | 2.160275  | 0.000011  |
| Au | -0.503411 | 2.217215  | -1.485072 |

|    |           |           |           |
|----|-----------|-----------|-----------|
| Au | -0.503411 | 2.217194  | 1.485094  |
| Au | 1.656149  | 3.281818  | 0.000014  |
| Au | 3.336422  | -0.080999 | 0.000003  |
| Au | 2.161850  | 1.472750  | -2.090776 |
| Au | 2.282400  | -1.357518 | -2.337392 |
| Au | -0.288854 | -2.211553 | -1.486052 |
| Au | -0.288857 | -2.211558 | 1.486022  |
| Au | -2.662672 | -2.398583 | -0.000017 |
| Au | -2.223751 | -0.092913 | -1.617020 |
| Au | -0.007408 | 0.028226  | -3.253257 |
| Au | -0.007416 | 0.028187  | 3.253257  |
| Au | 2.161846  | 1.472724  | 2.090800  |
| Au | 2.282396  | -1.357546 | 2.337382  |
| Au | 2.018225  | -2.898951 | -0.000014 |
| Au | -4.544459 | -0.195553 | -0.000007 |
| Ga | 0.608654  | 0.050240  | -0.000005 |

**I(1)**

|    |           |           |           |
|----|-----------|-----------|-----------|
| O  | -6.619420 | -1.182247 | -0.000713 |
| O  | -7.454702 | -0.225067 | 0.005524  |
| Au | -4.425529 | -0.712240 | -0.000512 |
| Au | -2.066975 | -0.241233 | -1.456390 |
| Au | 0.068614  | -0.057756 | -3.202021 |
| Au | 0.079486  | -2.342212 | -1.481985 |
| Au | 2.502570  | -2.744159 | 0.000528  |
| Au | 2.525260  | -1.142378 | 2.277454  |

|    |           |           |           |
|----|-----------|-----------|-----------|
| Au | 2.155294  | 1.668041  | 2.347672  |
| Au | 0.067865  | -0.057106 | 3.201981  |
| Au | 0.079155  | -2.341915 | 1.482403  |
| Au | -2.271922 | -2.688370 | -0.000024 |
| Au | -2.067345 | -0.240993 | 1.455952  |
| Au | -0.543861 | 2.133595  | 1.445691  |
| Au | 1.676442  | 3.113097  | -0.000156 |
| Au | 2.155856  | 1.667560  | -2.347572 |
| Au | 2.525794  | -1.142845 | -2.276703 |
| Au | 3.220589  | 0.429229  | 0.000301  |
| Ga | 0.594999  | -0.030392 | 0.000033  |
| Au | -3.092449 | 2.010912  | -0.000667 |
| Au | -0.543512 | 2.133355  | -1.446369 |
| C  | -4.416644 | 3.488796  | -0.000557 |
| O  | -5.116686 | 4.393227  | -0.000382 |

**TS(1)**

|    |           |           |           |
|----|-----------|-----------|-----------|
| O  | -5.722362 | 0.021424  | 0.759573  |
| O  | -6.197982 | 0.690391  | -0.261108 |
| Au | -4.207190 | -1.568171 | 0.300356  |
| Au | -2.285250 | -0.517714 | -1.433141 |
| Au | 0.003930  | -0.590952 | -2.948841 |
| Au | 0.673142  | -2.752799 | -1.155937 |
| Au | 3.026133  | -2.142928 | 0.302023  |
| Au | 2.683345  | -0.499210 | 2.505354  |
| Au | 1.865336  | 2.223183  | 2.155513  |

|    |           |           |           |
|----|-----------|-----------|-----------|
| Au | 0.072708  | 0.281017  | 3.193641  |
| Au | 0.475294  | -2.146220 | 1.684509  |
| Au | -1.786357 | -2.866245 | 0.128366  |
| Au | -2.009679 | -0.358518 | 1.530474  |
| Au | -0.798125 | 2.163814  | 1.171148  |
| Au | 1.301835  | 3.191789  | -0.431672 |
| Au | 1.798780  | 1.590442  | -2.677865 |
| Au | 2.713640  | -1.092058 | -2.304618 |
| Au | 2.766669  | 0.713621  | -0.097390 |
| Ga | 0.244689  | -0.155967 | -0.165915 |
| Au | -3.294753 | 1.958982  | -0.047970 |
| Au | -0.885217 | 1.914213  | -1.712027 |
| C  | -5.275835 | 2.289413  | -0.540676 |
| O  | -5.949070 | 3.090801  | -1.049018 |

**I(2)**

|    |           |           |           |
|----|-----------|-----------|-----------|
| O  | -5.893764 | 0.222919  | 0.611028  |
| O  | -6.014920 | 1.485453  | -0.056069 |
| Au | -4.298096 | -1.008229 | -0.118524 |
| Au | -2.102484 | 0.103430  | -1.485397 |
| Au | -0.040466 | 0.982249  | -3.061648 |
| Au | 0.151364  | -1.755056 | -2.173127 |
| Au | 2.622781  | -2.325516 | -0.895642 |
| Au | 2.690375  | -1.748124 | 1.832633  |
| Au | 2.152005  | 0.912497  | 2.777976  |
| Au | 0.217081  | -1.124172 | 3.032376  |

|    |           |           |           |
|----|-----------|-----------|-----------|
| Au | 0.257071  | -2.716107 | 0.623549  |
| Au | -2.191985 | -2.668973 | -0.824001 |
| Au | -1.973461 | -0.880873 | 1.405194  |
| Au | -0.603771 | 1.504511  | 2.108985  |
| Au | 1.540621  | 2.980399  | 0.990937  |
| Au | 1.949838  | 2.478478  | -1.736414 |
| Au | 2.514794  | -0.163353 | -2.673698 |
| Au | 2.917915  | 0.474979  | 0.063176  |
| Ga | 0.326868  | -0.030886 | -0.027570 |
| Au | -3.115551 | 1.779696  | 0.768065  |
| Au | -0.704097 | 2.470647  | -0.661913 |
| C  | -5.017774 | 2.411461  | 0.100101  |
| O  | -5.185944 | 3.549928  | -0.251906 |

**TS(2)**

|    |           |           |           |
|----|-----------|-----------|-----------|
| O  | -5.280850 | 0.936581  | -0.204137 |
| O  | -6.020748 | -0.071823 | -1.360855 |
| Au | -3.493306 | 2.008340  | -0.949440 |
| Au | -1.895339 | 1.225606  | 1.287470  |
| Au | 0.330316  | 2.816757  | 1.663016  |
| Au | 1.884722  | 2.931862  | -0.659263 |
| Au | 3.647335  | 0.753098  | -0.741897 |
| Au | 2.749851  | -1.538860 | -1.981922 |
| Au | 1.173315  | -3.286011 | -0.424258 |
| Au | 0.055780  | -1.837860 | -2.663895 |
| Au | 1.086650  | 0.816695  | -2.359548 |



|    |           |           |           |
|----|-----------|-----------|-----------|
| Au | -0.856874 | 2.645289  | -1.063664 |
| Au | -1.753407 | 0.111701  | -2.033163 |
| Au | -1.384039 | -2.211556 | -0.171926 |
| Au | 0.461083  | -2.613439 | 2.223639  |
| Au | 0.447484  | 0.163794  | 2.802170  |
| Au | 2.777379  | 1.473918  | 1.838537  |
| Au | 2.485018  | -1.161239 | 0.954534  |
| Ga | 0.213268  | 0.018779  | 0.038930  |
| Au | -3.699085 | -0.789098 | 0.198589  |
| Au | -1.989393 | -1.285494 | 2.491424  |
| C  | -5.389198 | -1.170749 | -1.228033 |
| O  | -5.504361 | -2.266561 | -1.717584 |

**Product**

|    |           |           |           |
|----|-----------|-----------|-----------|
| O  | -5.076851 | 0.256102  | -0.703923 |
| Au | -3.677556 | 1.703694  | -1.264227 |
| Au | -2.188152 | 0.970791  | 1.156611  |
| Au | -0.167205 | 2.693258  | 1.817833  |
| Au | 1.561351  | 3.134354  | -0.340421 |
| Au | 3.458055  | 1.107801  | -0.493924 |
| Au | 2.969895  | -1.205864 | -1.892927 |
| Au | 1.453507  | -3.141056 | -0.518051 |
| Au | 0.345115  | -1.706676 | -2.768337 |
| Au | 1.082927  | 1.004812  | -2.208247 |
| Au | -1.076751 | 2.596595  | -1.005874 |
| Au | -1.653561 | 0.071690  | -2.222421 |

|    |           |           |           |
|----|-----------|-----------|-----------|
| Au | -1.245857 | -2.358052 | -0.435121 |
| Au | 0.458127  | -2.709194 | 2.085891  |
| Au | 0.139823  | 0.016964  | 2.814385  |
| Au | 2.403179  | 1.600407  | 2.097211  |
| Au | 2.418013  | -0.996923 | 1.060586  |
| Ga | 0.074512  | -0.056216 | 0.049471  |
| Au | -3.690748 | -1.141581 | -0.059995 |
| Au | -2.105290 | -1.644893 | 2.228900  |
